# Supplementary material
Source: publisher figshare collection journal article supplement (https://future-science-group.figshare.com/ndownloader/files/34105547)
Supplement: Supplementary file 1 [file 34105547]

|  | **n (%)** |
| --- | --- |
| How much of the information presented was new to you?  A little of it  About half of it  Most of it  All of it | 3 (13.0)  9 (39.1)  6 (26.1)  5 (21.7) |
| How much of the information presented in the webinar was useful to you?  A little of it  Most of it  All of it | 1 (4.4)  1 (4.4)  21 (91.3) |
| The information presented was clear.  Disagree  Agree  Strongly agree | 3 (13.0)  3 (13.0)  17 (74.0) |
| The length of the webinar was…  Too short  Just right | 11 (47.8)  12 (52.2) |
| The content of the webinar was…  Just right | 23 (100) |
| Were all of your questions answered?  Yes | 20 (87.0) |
| How would you rate this workshop overall?  Fair  Very Good  Excellent | 2 (9.1)  8 (36.4)  12 (54.6) |
| Would you recommend this workshop to other healthcare interpreters?  Yes | 23 (100) |

**Overall training evaluation**
